# Supplementary material for: Magnetic field induced high-density SERS active assembly of Fe3O4@Au nanostars in a glass capillary for food colorant detection
Source: Royal Society of Chemistry journal article supplement (doi:10.1039/d1ay00989c), 2021-01-01
Supplement: d1ay00989c1.pdf [file d1ay00989c1.pdf]

## Magnetic field induced high-density SERS active assembly of $\text{Fe}_3\text{O}_4\text{@Au}$ nanostar in glass capillary for food colorants detection

Lihua Xu<sup>#</sup>, Qianqian Ding<sup>#×</sup>

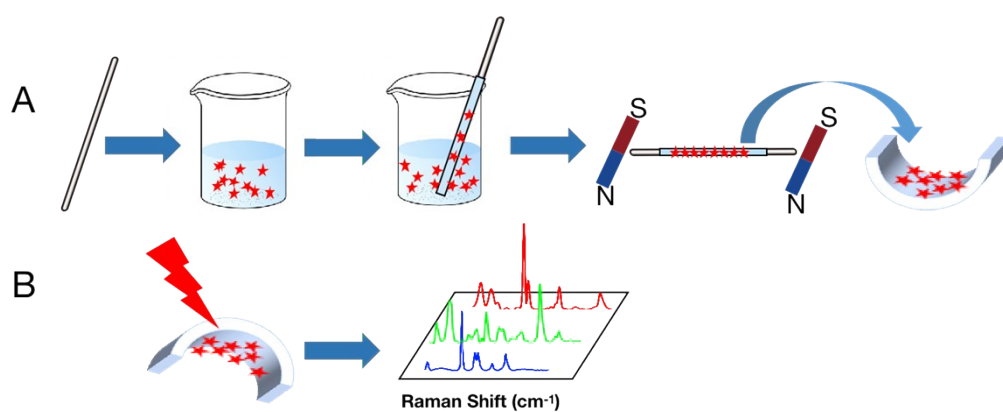

Figure S1 Scheme of the magnetic field-induced assembly process in the capillaries (A) and SERS detection (B).
